# Supplementary material for: Selective cage boron/carbon extrusion reaction of 13-vertex carborane μ-1,2-(CH2)3–1,2-C2B11H11: formation of nido-CB10, closo-CB10, and closo-C2B10 species
Source: Royal Society of Chemistry journal article supplement (doi:10.1039/c1cc12023a), 2011-01-01
Supplement: c1cc12023a.pdf [file c1cc12023a.pdf]

# Supporting Information

## Selective Cage Boron/Carbon Extrusion Reaction of 13- Vertex Carborane $\mu$ -1,2-(CH<sub>2</sub>)<sub>3</sub>-1,2-C<sub>2</sub>B<sub>11</sub>H<sub>11</sub>: Formation of *nido*-CB<sub>10</sub>, *closo*-CB<sub>10</sub>, and *closo*-C<sub>2</sub>B<sub>10</sub> Species

Jian Zhang, Hoi-Shan Chan, and Zuowei Xie\*

Department of Chemistry and State Key Laboratory on Synthetic Chemistry,  
The Chinese University of Hong Kong,  
Shatin, NT, Hong Kong, China

### Table of Contents

|                                                                                                |    |
|------------------------------------------------------------------------------------------------|----|
| Experimental Section                                                                           | S2 |
| Crystal Data and Summary of Data Collection and Refinement for [2][PSH],<br>[2i][PSH], 3 and 4 | S6 |
| References                                                                                     | S7 |

## Experimental Section

**General Procedures.** Unless otherwise noted, all experiments were performed under an atmosphere of dry dinitrogen or argon with the rigid exclusion of air and moisture using standard Schlenk or cannula techniques, or in a glovebox.  $\text{CH}_2\text{Cl}_2$  were refluxed over  $\text{CaH}_2$  for several days and distilled immediately prior to use. Other organic solvents were refluxed over sodium benzophenone ketyl for several days and freshly distilled prior to use. All chemicals were purchased from either Aldrich or Acros Chemical Co. and used as received unless otherwise noted.  $\mu$ -1,2- $(\text{CH}_2)_3$ -1,2- $\text{C}_2\text{B}_{11}\text{H}_{11}$  (**1**) was prepared according to literature methods.<sup>1</sup> Infrared spectra were obtained from KBr pellets (prepared in the glovebox if the complex was hygroscopic or air sensitive) on a Perkin-Elmer 1600 Fourier transform spectrometer. The  $^1\text{H}$  and  $^{13}\text{C}$  NMR spectra were recorded on a Bruker DPX 400 spectrometer or a Bruker DPX 400Q spectrometer at 400 and 100 MHz, respectively. The  $^{11}\text{B}$  NMR spectra were recorded on a Bruker DPX 300 spectrometer at 96 MHz, or a Bruker DPX 400 spectrometer or a Bruker DPX 400Q spectrometer at 128 MHz. All chemical shifts are reported in  $\delta$  units with references to the residual protons of the deuterated solvents for proton chemical shifts, to the carbons of the deuterated solvents for carbon chemical shifts according to the literature, to external  $\text{BF}_3\cdot\text{OEt}_2$  (0.0 ppm) for boron chemical shifts. Mass spectra were recorded on a Thermo Finnigan MAT 95 XL spectrometry. Elemental analyses were performed by MEDAC Ltd., U.K. or Shanghai Institute of Organic Chemistry, CAS, Shanghai, China.

**Preparation of [nido- $\mu$ -7,8- $(\text{CH}_2)_3\text{CHB}(\text{OMe})_2$ -7- $\text{CB}_{10}\text{H}_{11}$ ][PSH] ([2][PSH]).** A solution of  $\text{Et}_3\text{N}$  (1.0 mL, 726 mg, 7.2 mmol) in MeOH (10.0 mL) was added to **1** (98 mg, 0.50 mmol) at 0 °C, and the mixture was stirred at room temperature for 24 h. A

PS solution in MeOH (0.25 M, 10.0 mL, 2.5 mmol) was then added to give a white suspension in 5 min. After removal of the volatile materials, the residue was thoroughly washed with Et<sub>2</sub>O to afford **[2][PSH]** as a white solid (214 mg, 90%). X-ray-quality crystals were obtained by recrystallization from THF. Found: C, 53.58; H, 9.14; N, 5.82. Calc. for C<sub>21</sub>H<sub>43</sub>B<sub>11</sub>N<sub>2</sub>O<sub>2</sub>: C, 53.16; H, 9.13; N, 5.90%. <sup>1</sup>H NMR (400 MHz, CD<sub>2</sub>Cl<sub>2</sub>): δ = 8.03 (dd, *J*<sub>1</sub> = 8.3 Hz, *J*<sub>2</sub> = 0.9 Hz, 2H, C<sub>10</sub>H<sub>6</sub>), 7.79 (dd, *J*<sub>1</sub> = 7.6 Hz, *J*<sub>2</sub> = 1.0 Hz, 2H, C<sub>10</sub>H<sub>6</sub>), 7.72 (t, *J* = 7.9 Hz, 2H, C<sub>10</sub>H<sub>6</sub>), 3.49 (s, 6H, OCH<sub>3</sub>), 3.19 (d, *J* = 2.7 Hz, 12H, NCH<sub>3</sub>), 2.22 (m, 1H, δ-CH<sub>2</sub>), 1.61 (m, 1H, δ-CH<sub>2</sub>), 1.56 (m, 1H, γ-CH<sub>2</sub>), 1.50 (m, 1H, β-CH<sub>2</sub>), 1.33 (m, 1H, β-CH<sub>2</sub>), 1.19 (m, 1H, γ-CH<sub>2</sub>), 0.80 (br, 1H, α-CH), -3.20 (br, 2H, bridging H). <sup>13</sup>C{<sup>1</sup>H} NMR (100 MHz, CD<sub>2</sub>Cl<sub>2</sub>): δ = 143.9, 136.0, 130.2, 127.7, 121.6, 119.0 (C<sub>10</sub>H<sub>6</sub>), 52.0 (br, cage C), 51.4 (OCH<sub>3</sub>), 47.0 (NCH<sub>3</sub>), 39.0 (δ-CH<sub>2</sub>), 28.3 (γ-CH<sub>2</sub>), 25.6 (β-CH<sub>2</sub>), 11.1 (br, α-CH). <sup>11</sup>B NMR (128 MHz, CD<sub>2</sub>Cl<sub>2</sub>): δ = 32.0 (s, 1B), -2.1 (s, 1B), -5.3 (d, *J*<sub>B,H</sub> = 142 Hz, 1B), -10.1 (d, *J*<sub>B,H</sub> = 119 Hz, 3B), -23.4 (d, *J*<sub>B,H</sub> = 132 Hz, 1B), -24.5 (d, *J*<sub>B,H</sub> = 162 Hz, 1B), -25.7 (d, *J*<sub>B,H</sub> = 140 Hz, 1B), -30.4 (d, *J*<sub>B,H</sub> = 142 Hz, 1B), -34.4 (d, *J*<sub>B,H</sub> = 127 Hz, 1B). IR (KBr): ν<sub>max</sub>/cm<sup>-1</sup> 2519 (vs, BH).

**Preparation of [nido-μ-η:η:η-7,8,10-(CH<sub>2</sub>)<sub>3</sub>CHB(OMe)-7-CB<sub>10</sub>H<sub>10</sub>][PSH] ([2i][PSH]).** A MeOH solution (5 mL) of PS (118 mg, 0.55 mmol) was added to **1** (98 mg, 0.50 mmol) with stirring for 5 min to give a white suspension. After removal of the solvent, the residue was thoroughly washed with Et<sub>2</sub>O to afford **[2i][PSH]** as a white solid (199 mg, 90%). X-ray-quality crystals were obtained by recrystallization from THF. Found: C, 54.40; H, 8.60; N, 6.53. Calc. for C<sub>20</sub>H<sub>39</sub>B<sub>11</sub>N<sub>2</sub>O: C, 54.29; H, 8.88; N, 6.33%. <sup>1</sup>H NMR (400 MHz, CD<sub>2</sub>Cl<sub>2</sub>): δ = 8.04 (d, *J* = 8.2 Hz, 2H, C<sub>10</sub>H<sub>6</sub>), 7.85 (d, *J* = 7.6 Hz, 2H, C<sub>10</sub>H<sub>6</sub>), 7.74 (dd, av. *J* = 7.9 Hz, 2H, C<sub>10</sub>H<sub>6</sub>), 3.70 (s, 3H, OCH<sub>3</sub>), 3.20 (d, *J* = 2.4 Hz, 12H, NCH<sub>3</sub>), 2.45 (m, 1H, δ-CH<sub>2</sub>), 2.30 (m, 1H, β-CH<sub>2</sub>),

1.74 (m, 1H,  $\delta$ -CH<sub>2</sub>), 1.66 (m, 1H,  $\gamma$ -CH<sub>2</sub>), 1.59 (br, 1H,  $\alpha$ -CH), 1.32 (m, 1H,  $\gamma$ -CH<sub>2</sub>), 1.16 (m, 1H,  $\beta$ -CH<sub>2</sub>). <sup>13</sup>C{<sup>1</sup>H} NMR (100 MHz, CD<sub>2</sub>Cl<sub>2</sub>):  $\delta$  = 143.8, 135.8, 130.1, 127.5, 121.7, 118.8 (C<sub>10</sub>H<sub>6</sub>), 104.0 (cage C), 55.4 (OCH<sub>3</sub>), 46.8 (NCH<sub>3</sub>), 37.4 ( $\delta$ -CH<sub>2</sub>), 29.8 ( $\beta$ -CH<sub>2</sub>), 27.1 ( $\gamma$ -CH<sub>2</sub>), 15.7 ( $\alpha$ -CH). <sup>11</sup>B NMR (96 MHz, CD<sub>2</sub>Cl<sub>2</sub>):  $\delta$  = 42.5 (s, 1B), 20.4 (d,  $J_{B,H}$  = 144 Hz, 1B), 0.2 (d,  $J_{B,H}$  = 166 Hz, 1B), -2.5 (d,  $J_{B,H}$  = 132 Hz, 1B), -9.9 (d,  $J_{B,H}$  = 128 Hz, 1B), -12.0 (d,  $J_{B,H}$  = 139 Hz, 1B), -14.0 (d,  $J_{B,H}$   $\approx$  106 Hz, 1B), -14.6 (d,  $J_{B,H}$  = 115 Hz, 2B), -18.3 (d,  $J_{B,H}$  = 115 Hz, 1B), -21.3 (d,  $J_{B,H}$  = 117 Hz, 1B). IR (KBr):  $\nu_{\max}/\text{cm}^{-1}$  2514 (vs, BH).

**Preparation of  $\mu$ -2,4-(CH<sub>2</sub>)<sub>3</sub>CHBH(Py)<sub>2</sub>-2-CB<sub>10</sub>H<sub>9</sub> (3).** Compound **1** (98 mg, 0.50 mmol) was slowly added to Py (5 mL) at -30 °C. The resulting dark blue solution was stirred at room temperature overnight. After removal of the solvent, the residue was washed with THF to give **3** as a white powder (200 mg, 56%). X-ray-quality crystals were obtained by recrystallization from DMSO/MeOH. Found: C, 50.59; H, 7.85; N, 7.57. Calc. for C<sub>15</sub>H<sub>27</sub>B<sub>11</sub>N<sub>2</sub>: C, 50.85; H, 7.68; N, 7.91%. <sup>1</sup>H NMR (400 MHz, DMSO-*d*<sub>6</sub>):  $\delta$  = 9.07 (d,  $J$  = 5.4 Hz, 2H, C<sub>5</sub>H<sub>5</sub>N), 9.00 (d,  $J$  = 5.4 Hz, 2H, C<sub>5</sub>H<sub>5</sub>N), 8.35 (t,  $J$  = 7.6 Hz, 1H, C<sub>5</sub>H<sub>5</sub>N), 8.32 (t,  $J$  = 7.7 Hz, 1H, C<sub>5</sub>H<sub>5</sub>N), 7.90 (t,  $J$  = 7.0 Hz, 2H, C<sub>5</sub>H<sub>5</sub>N), 7.84 (t,  $J$  = 7.0 Hz, 2H, C<sub>5</sub>H<sub>5</sub>N), 2.53 (m, 1H,  $\delta$ -CH<sub>2</sub>), 2.28 (m, 1H,  $\delta$ -CH<sub>2</sub>), 1.69 (m, 1H,  $\gamma$ -CH<sub>2</sub>), 1.28 (m, 1H,  $\gamma$ -CH<sub>2</sub>), 0.94 (m, 2H,  $\beta$ -CH<sub>2</sub>), 0.52 (m, 1H,  $\alpha$ -CH). <sup>13</sup>C{<sup>1</sup>H} NMR (100 MHz, DMSO-*d*<sub>6</sub>):  $\delta$  = 147.7, 146.3, 143.9, 143.7, 127.3, 126.4 (C<sub>5</sub>H<sub>5</sub>N), 72.8 (cage C), 34.8 ( $\delta$ -CH<sub>2</sub>), 27.1 ( $\beta$ -CH<sub>2</sub>), 26.5 ( $\gamma$ -CH<sub>2</sub>), 14.9 ( $\alpha$ -CH). <sup>11</sup>B NMR (128 MHz, DMSO-*d*<sub>6</sub>):  $\delta$  = 1.9 (br, unresolved, 1B), -10.2 (br, 9B), -15.5 (br, 1B). IR (KBr):  $\nu_{\max}/\text{cm}^{-1}$  2492 (vs, BH).

**Preparation of 4-B(bipy)- $\mu$ -1,2-(CH<sub>2</sub>)<sub>3</sub>-1,2-C<sub>2</sub>B<sub>10</sub>H<sub>9</sub> (4).** To a toluene (10 mL) solution of **1** (98 mg, 0.50 mmol) was added bipyridine (78 mg, 0.50 mmol) and the mixture was heated at 60 °C for 72 h in a sealed tube to give a red solution. After

filtration, toluene was removed and 1 mL of CH<sub>2</sub>Cl<sub>2</sub> was added to dissolve the red solid, to which was added a 50 mL of *n*-hexane. After filtration and removal of the volatile materials, the residue was washed with a minimum amount of Et<sub>2</sub>O to give **4** as a red solid (104 mg, 59%). X-ray-quality crystals were obtained by recrystallization from Et<sub>2</sub>O. <sup>1</sup>H NMR (400 MHz, CD<sub>2</sub>Cl<sub>2</sub>): δ = 8.33 (d, *J* = 7.3 Hz, 2H, C<sub>10</sub>H<sub>8</sub>N<sub>2</sub>B), 7.49 (dt, *J* = 9.1 Hz, 2H, C<sub>10</sub>H<sub>8</sub>N<sub>2</sub>B), 6.43 (m, 2H, C<sub>10</sub>H<sub>8</sub>N<sub>2</sub>B), 6.30 (m, 2H, C<sub>10</sub>H<sub>8</sub>N<sub>2</sub>B), 2.53 (m, 2H, CH<sub>2</sub>), 2.38 (m, 3H, CH<sub>2</sub>), 2.20 (m, 1H, CH<sub>2</sub>). <sup>13</sup>C{<sup>1</sup>H} NMR (100 MHz, CD<sub>2</sub>Cl<sub>2</sub>): δ = 129.0, 120.4, 118.4, 115.1, 111.2 (aromatic C), 86.6 (cage C), 35.3, 35.1 (CCH<sub>2</sub>), 32.6 (CCH<sub>2</sub>CH<sub>2</sub>). <sup>11</sup>B NMR (128 MHz, CD<sub>2</sub>Cl<sub>2</sub>): δ = 19.7 (brs, 1B), -6.2 (br, 2B), -7.0 (br, 1B), -7.4 (br, 1B), -8.3 (br, 1B), -8.9 (br, 1B), -11.1 (br, 4B). IR (KBr): ν<sub>max</sub>/cm<sup>-1</sup> 2569 (vs, BH). HRMS (EI): *m/z* calcd for C<sub>15</sub>H<sub>23</sub><sup>11</sup>B<sub>9</sub><sup>10</sup>B<sub>2</sub>N<sub>2</sub> [M]<sup>+</sup>: 350.2952; Found: 350.2960.

**X-ray Structure Determination.** All single crystals were immersed in Paraton-N oil and sealed under N<sub>2</sub> in thin-walled glass capillaries. Data were collected on a Bruker SMART 1000 CCD diffractometer or a Bruker AXS kappa Apex II Duo diffractometer using Mo-Kα radiation at 173K for [2][PSH], 123K for [2i][PSH] and **4**, and 296K for **3**, respectively. An empirical absorption correction was applied using the SADABS program.<sup>2</sup> All structures were solved by direct methods and subsequent Fourier difference techniques and refined anisotropically for all non-hydrogen atoms by full-matrix least squares calculations on *F*<sup>2</sup> using the SHELXTL program package.<sup>3</sup> Most of the cage hydrogen atoms were located from different Fourier syntheses. All other hydrogen atoms were geometrically fixed using the riding model. Crystal data and details of data collection and structure refinements were given in Table S1.

**Table S1. Crystal Data and Summary of Data Collection and Refinement for [2][PSH], [2i][PSH], 3 and 4.**

| compd. No.                                    | [2][PSH]                                                                      | [2i][PSH]                                                        | 3                                                              | 4                                                              |
|-----------------------------------------------|-------------------------------------------------------------------------------|------------------------------------------------------------------|----------------------------------------------------------------|----------------------------------------------------------------|
| formula                                       | C <sub>21</sub> H <sub>43</sub> B <sub>11</sub> N <sub>2</sub> O <sub>2</sub> | C <sub>20</sub> H <sub>39</sub> B <sub>11</sub> N <sub>2</sub> O | C <sub>15</sub> H <sub>27</sub> B <sub>11</sub> N <sub>2</sub> | C <sub>15</sub> H <sub>23</sub> B <sub>11</sub> N <sub>2</sub> |
| crystal size (mm)                             | 0.50 x 0.30 x 0.20                                                            | 0.40 x 0.30 x 0.20                                               | 0.40 x 0.30 x 0.20                                             | 0.40 x 0.30 x 0.20                                             |
| fw                                            | 474.5                                                                         | 442.4                                                            | 354.3                                                          | 350.3                                                          |
| crystal system                                | triclinic                                                                     | monoclinic                                                       | orthorhombic                                                   | orthorhombic                                                   |
| space group                                   | <i>P</i> -1                                                                   | <i>P</i> 2 <sub>1</sub> / <i>c</i>                               | <i>P</i> 2 <sub>1</sub> 2 <sub>1</sub> 2 <sub>1</sub>          | <i>Pna</i> 2 <sub>1</sub>                                      |
| <i>a</i> , Å                                  | 8.425(1)                                                                      | 15.573(1)                                                        | 9.242(2)                                                       | 24.306(2)                                                      |
| <i>b</i> , Å                                  | 10.907(1)                                                                     | 9.830(1)                                                         | 12.376(2)                                                      | 16.579(1)                                                      |
| <i>c</i> , Å                                  | 15.173(1)                                                                     | 18.031(1)                                                        | 18.093(3)                                                      | 14.290 (1)                                                     |
| $\alpha$ , deg                                | 85.36(1)                                                                      | 90                                                               | 90                                                             | 90                                                             |
| $\beta$ , deg                                 | 86.94(1)                                                                      | 104.10(1)                                                        | 90                                                             | 90                                                             |
| $\gamma$ , deg                                | 83.34(1)                                                                      | 90                                                               | 90                                                             | 90                                                             |
| <i>V</i> , Å <sup>3</sup>                     | 1378.9(1)                                                                     | 2677.2(2)                                                        | 2069.5(6)                                                      | 5758.3(7)                                                      |
| <i>Z</i>                                      | 2                                                                             | 4                                                                | 4                                                              | 12                                                             |
| <i>D</i> <sub>calcd</sub> , Mg/m <sup>3</sup> | 1.143                                                                         | 1.098                                                            | 1.137                                                          | 1.212                                                          |
| radiation ( $\lambda$ ), Å                    | Mo K $\alpha$                                                                 | Mo K $\alpha$                                                    | Mo K $\alpha$                                                  | Mo K $\alpha$                                                  |
|                                               | (0.71073)                                                                     | (0.71073)                                                        | (0.71073)                                                      | (0.71073)                                                      |
| 2 $\theta$ max, deg                           | 50.5                                                                          | 50.0                                                             | 50.5                                                           | 50.5                                                           |
| $\mu$ , mm <sup>-1</sup>                      | 0.065                                                                         | 0.060                                                            | 0.058                                                          | 0.062                                                          |
| <i>F</i> (000)                                | 508                                                                           | 944                                                              | 744                                                            | 2184                                                           |
| no. of obsd                                   | 4967                                                                          | 4716                                                             | 3724                                                           | 10305                                                          |
| no. of params                                 | 337                                                                           | 307                                                              | 262                                                            | 757                                                            |
| goodness of fit                               | 1.092                                                                         | 1.040                                                            | 0.971                                                          | 1.038                                                          |
| R1                                            | 0.052                                                                         | 0.099                                                            | 0.058                                                          | 0.082                                                          |
| wR2                                           | 0.063                                                                         | 0.115                                                            | 0.164                                                          | 0.148                                                          |

## References

1. L. Deng, H.-S. Chan and Z. Xie, *J. Am. Chem. Soc.*, 2006, **128**, 5219-5230.
2. G. M. Sheldrick, *SADABS: Program for Empirical Absorption Correction of Area Detector Data*, (1996) University of Göttingen, Germany.
3. G. M. Sheldrick, *SHELXTL 5.10 for Windows NT: Structure Determination Software Programs*, (1997) Bruker Analytical X-ray systems, Inc., Madison, Wisconsin, USA.
